# Supplementary material
Source: PubMed Central journal article supplement (PMC3716113)

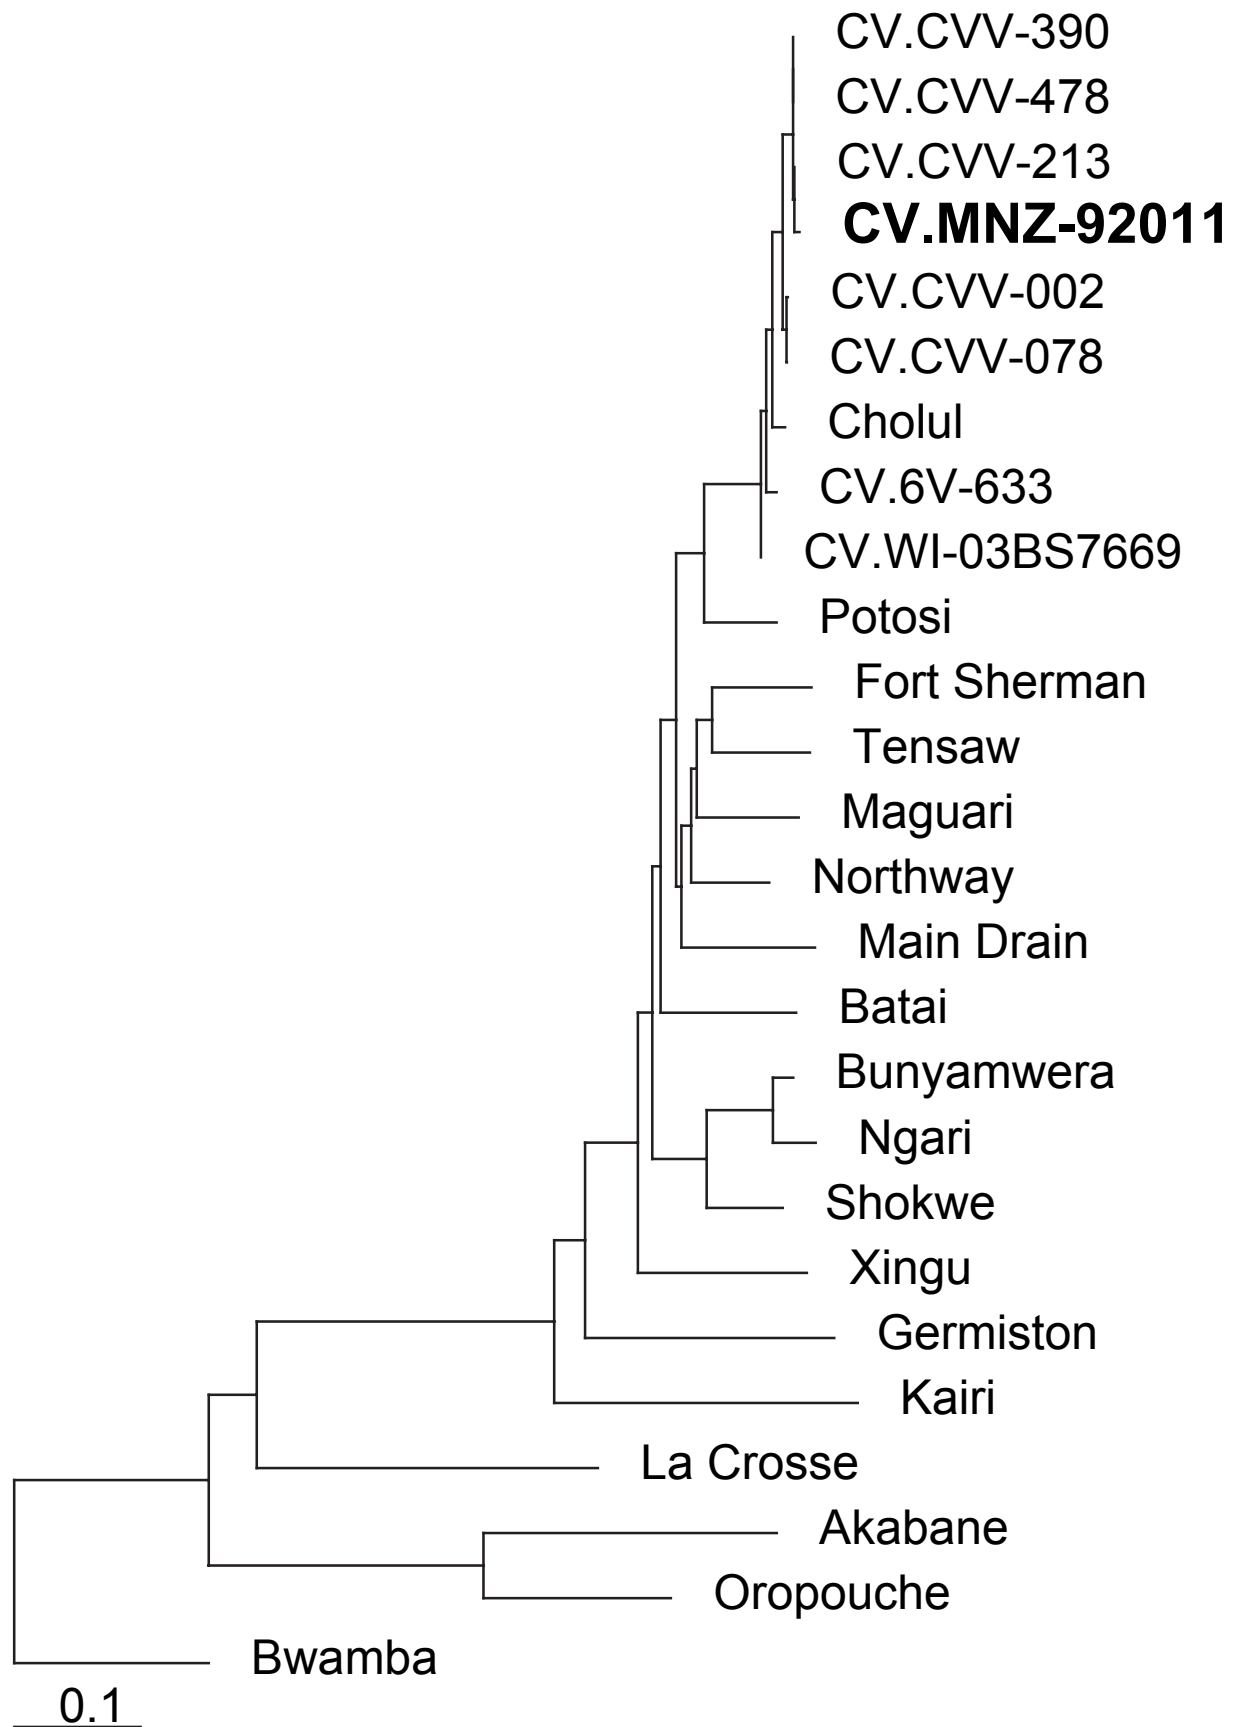

Supplement: JCM.00252-13_zjm999092519so2.pdf [file JCM.00252-13_zjm999092519so2.pdf]

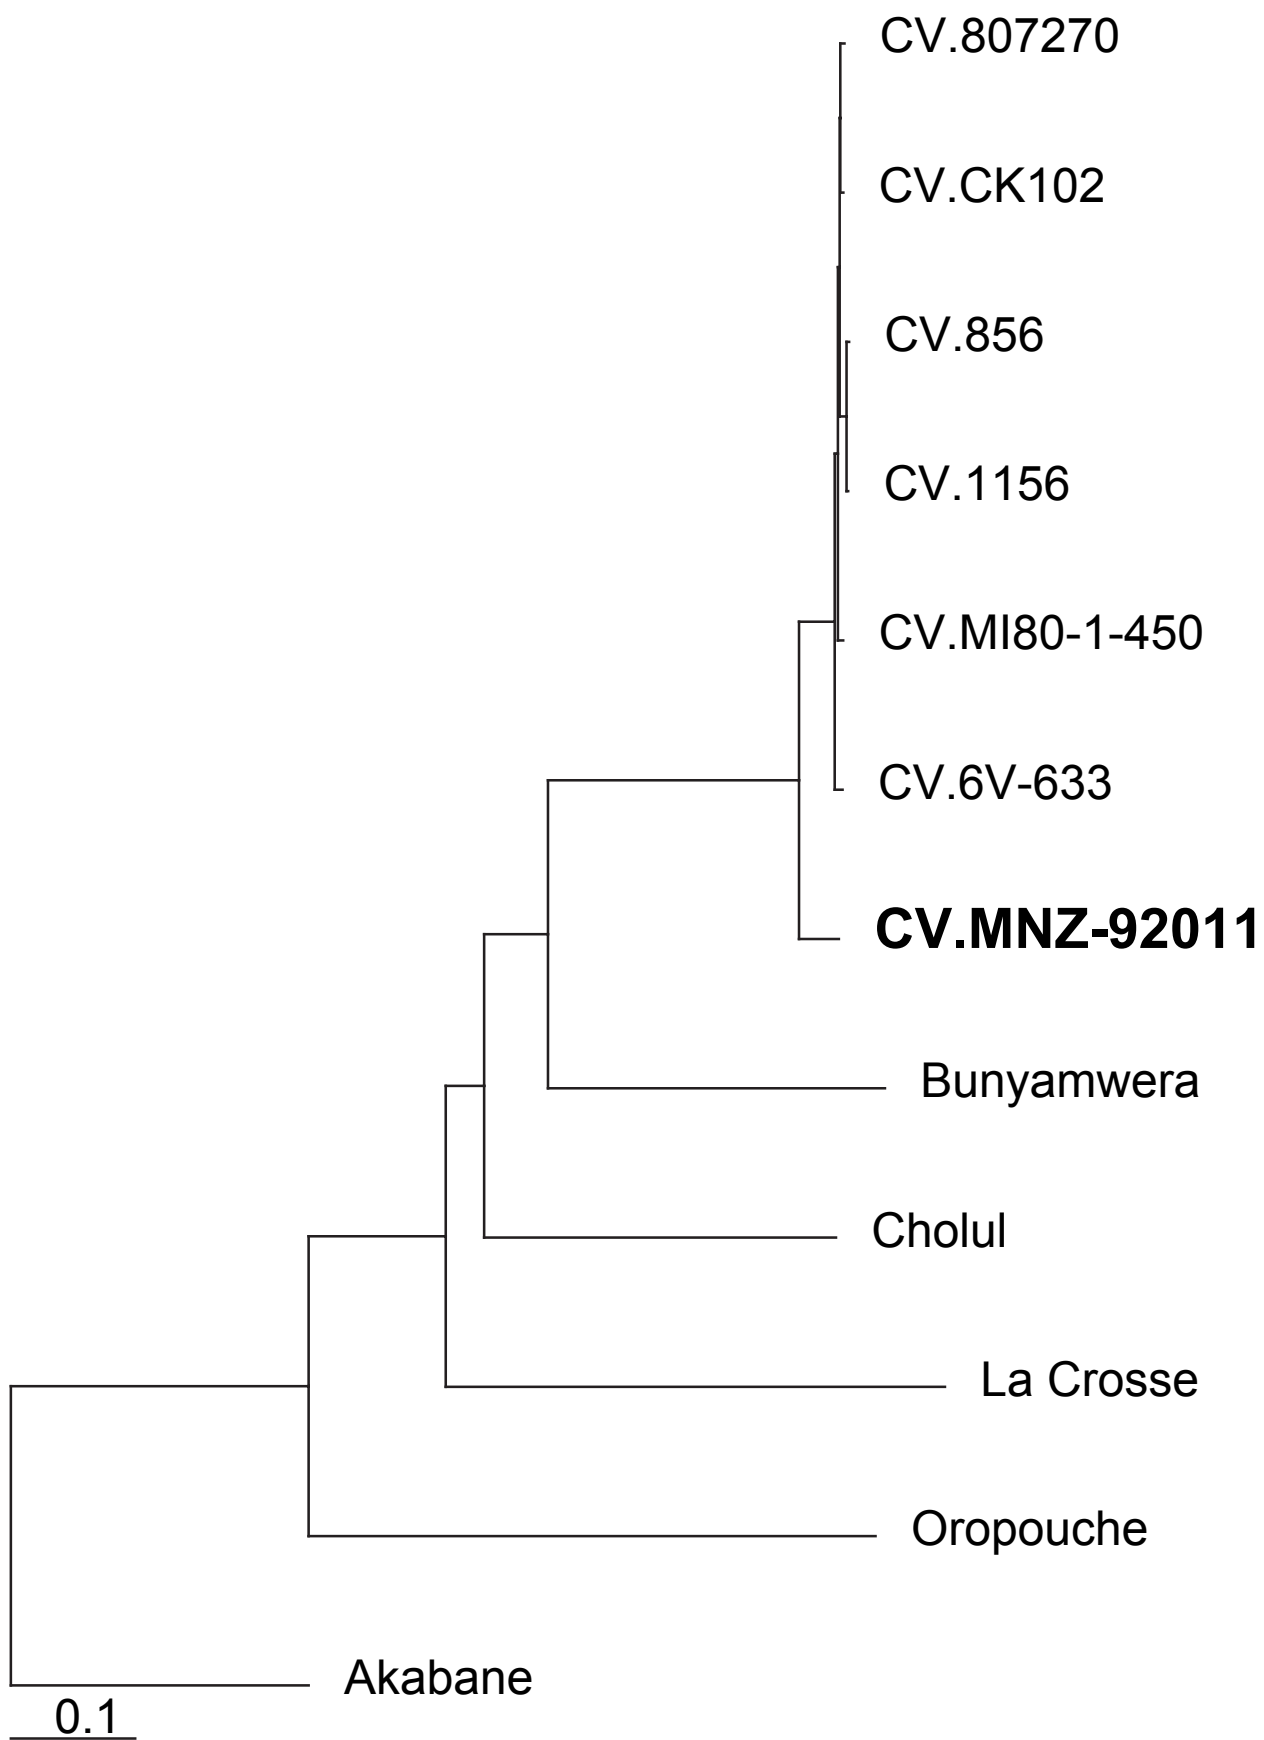

Supplement: JCM.00252-13_zjm999092519so3.pdf [file JCM.00252-13_zjm999092519so3.pdf]
